# Supplementary material for: Kappa-carrageenan oligosaccharides retard the progression of protein and lipid oxidation in mackerel (Scomber japonicus) fillets during frozen storage
Source: Royal Society of Chemistry journal article supplement (doi:10.1039/d0ra03431b), 2020-01-01
Supplement: d0ra03431b1.pdf [file d0ra03431b1.pdf]

Table S1 Performance description of ten metal oxide sensors in PEN3 electronic nose.

| No. | Sensor code | Performance description                                       | Reference<br>(mL/m <sup>3</sup> )  |
|-----|-------------|---------------------------------------------------------------|------------------------------------|
| 1   | W1C         | Aromatic and benzene compounds                                | C <sub>7</sub> H <sub>8</sub> , 10 |
| 2   | W5S         | Broad range sensitivity, sensitive to nitrogen oxides         | NO <sub>2</sub> , 1                |
| 3   | W3C         | Ammonia, sensitive to aromatic compounds                      | C <sub>6</sub> H <sub>6</sub> , 10 |
| 4   | W6S         | Mainly hydrogen, selectively                                  | H <sub>2</sub> , 100               |
| 5   | W5C         | Alkane, aromatic compounds                                    | C <sub>3</sub> H <sub>8</sub> , 1  |
| 6   | W1S         | Sensitive to methane                                          | CH <sub>4</sub> , 100              |
| 7   | W1W         | Sensitive to many organic compounds                           | H <sub>2</sub> S, 1                |
| 8   | W2S         | Alcohol, sensitive to aromatic compounds with broad range     | CO, 100                            |
| 9   | W2W         | Aromatic and sulfur organic compounds                         | H <sub>2</sub> S, 1                |
| 10  | W3S         | Reacts on high concentrations, sensitive to several compounds | CH <sub>4</sub> , 100              |

Table S2 Quantified data of volatile flavor collected from the control mackerel during 0–100 days of frozen storage.

| Sensor code | 0 day      | 20 day     | 40 day     | 60 day     | 80 day     | 100 day     |
|-------------|------------|------------|------------|------------|------------|-------------|
| W1C         | 1.3 ± 0.1a | 2.9 ± 0.2b | 2.9 ± 0.2b | 4.5 ± 0.1c | 6.0 ± 0.3d | 8.0 ± 0.4e  |
| W5S         | 8.7 ± 0.1c | 9.7 ± 0.2d | 9.1 ± 0.2c | 8.4 ± 0.2c | 6.5 ± 0.2b | 5.0 ± 0.1a  |
| W3C         | 1.3 ± 0.1a | 2.7 ± 0.2b | 3.0 ± 0.1b | 4.3 ± 0.2c | 6.5 ± 0.2d | 8.2 ± 0.3e  |
| W6S         | 0.6 ± 0.1a | 2.1 ± 0.1b | 2.2 ± 0.2b | 3.5 ± 0.2c | 7.1 ± 0.3d | 8.7 ± 0.3e  |
| W5C         | 1.0 ± 0.1a | 2.6 ± 0.2b | 3.0 ± 0.3b | 4.0 ± 0.2c | 6.8 ± 0.4d | 8.5 ± 0.3e  |
| W1S         | 1.0 ± 0.1a | 2.7 ± 0.1b | 3.0 ± 0.2b | 4.1 ± 0.1c | 4.3 ± 0.2c | 4.3 ± 0.2c  |
| W1W         | 0.9 ± 0.1a | 3.0 ± 0.2b | 3.2 ± 0.1b | 4.7 ± 0.2c | 7.8 ± 0.3d | 9.2 ± 0.3e  |
| W2S         | 0.7 ± 0.1a | 2.1 ± 0.2b | 2.8 ± 0.3b | 3.8 ± 0.2c | 8.5 ± 0.4d | 9.3 ± 0.4d  |
| W2W         | 0.9 ± 0.1a | 2.8 ± 0.2b | 3.2 ± 0.3b | 4.7 ± 0.1c | 9.0 ± 0.3d | 10.0 ± 0.4d |
| W3S         | 0.8 ± 0.1a | 2.4 ± 0.1b | 3.0 ± 0.2c | 4.0 ± 0.1d | 8.5 ± 0.3e | 9.8 ± 0.2f  |

Data represent the means ± standard deviation of 3 replicates. The means with different uppercase letters in the same row were significantly different at  $P < 0.05$ .

Table S3 Quantified data of volatile flavor collected from the control, 1.5% CO soaked-, 3.0% CO soaked-, and 4.5% CO soaked-samples (B) after 100 days of frozen storage.

| Sensor code | control     | 1.5% CO    | 3.0% CO    | 4.5% CO    |
|-------------|-------------|------------|------------|------------|
| W1C         | 8.0 ± 0.2c  | 7.3 ± 0.2b | 6.1 ± 0.2a | 5.9 ± 0.2a |
| W5S         | 5.0 ± 0.1a  | 5.7 ± 0.2a | 7.6 ± 0.3b | 7.0 ± 0.3b |
| W3C         | 8.2 ± 0.3d  | 7.2 ± 0.1c | 5.2 ± 0.1b | 4.5 ± 0.1a |
| W6S         | 8.7 ± 0.3b  | 8.5 ± 0.3b | 4.6 ± 0.2a | 5.2 ± 0.2a |
| W5C         | 8.5 ± 0.2c  | 7.0 ± 0.2b | 5.3 ± 0.2a | 5.0 ± 0.2a |
| W1S         | 4.3 ± 0.2a  | 4.5 ± 0.1a | 4.0 ± 0.1a | 4.2 ± 0.1a |
| W1W         | 9.2 ± 0.2c  | 7.8 ± 0.3b | 6.2 ± 0.1a | 6.8 ± 0.3a |
| W2S         | 9.3 ± 0.2c  | 8.6 ± 0.2b | 5.8 ± 0.2a | 5.4 ± 0.1a |
| W2W         | 10.0 ± 0.3c | 8.5 ± 0.2b | 6.6 ± 0.2a | 6.0 ± 0.2a |
| W3S         | 9.8 ± 0.2c  | 8.0 ± 0.1b | 5.0 ± 0.3a | 5.1 ± 0.2a |

Data represent the means ± standard deviation of 3 replicates. The means with different uppercase letters in the same row were significantly different at  $P < 0.05$ .
